# Supplementary material for: Loss of SET1/COMPASS methyltransferase activity reduces lifespan and fertility in Caenorhabditis elegans
Source: Life Sci Alliance. 2021 Dec 10;5(3):e202101140. doi: 10.26508/lsa.202101140 (PMC8675910; doi:10.26508/lsa.202101140)
Supplement: Supplementary file 2 [file LSA-2021-01140_TableS2.xlsx]

## Sheet: Table S2
	Table S2. List of selected proteins identified by mass spectrometry of HA::WDR-5.1 immunoprecipitations obtained from embryos carrying the wild type set-2 or the set-2(bn129) allele, and their mammalian homologue.
		protein name		HA::WDR-5.1 IP, SC (number/sample)
		C. elegans	H. sapiens	set-2(+)*	control*	set-2(bn129)	control
	SET2/SET1 Complex	CFP-1	CFP1	18	0	0	0
		SET-2	SET1	14	0	0	0
		SWD-2.1	WDR82	2	0	0	0
	SET16/MLL complex	SET-16	MLL1-4	133	0	8	0
		PIS-1	PTIP	58	0	22	0
		UTX-1	UTX	57	0	10	0
	core complex	RBBP-5	RBBP5	42	0	15	0
		ASH-2	ASH2	29	0	6	0
		WDR-5.1	WDR5	341	2	76	4
		DPY-30	DPY30	2	0	1	0
		* data previously published in Beurton et al. Nucleic Acids Res. 2019
